# Supplementary material
Source: PubMed Central journal article supplement (PMC2767527)

## Supplementary Information

### In Vivo Modification of Native Carrier Protein Domains.

**Andrew C. Mercer, Jordan L. Meier, Justin W. Torpey, Michael D. Burkart\***

Department of Chemistry and Biochemistry

University of California San Diego, La Jolla Ca 92037.

|                                                                      |        |
|----------------------------------------------------------------------|--------|
| Mascot Report from MS/MS Analysis.....                               | S1-S5  |
| Fluorescent SDS-PAGE analysis of pan KO's.....                       | S6     |
| Complete gel images.....                                             | S7-S8  |
| HPLC traces for all compound <b>2</b> CoA pathway intermediates..... | S8-S11 |
| Kinetics for pantetheine analogs.....                                | S12    |
| Structure of N5-Pan.....                                             | S12    |
| Scheme for synthesis of fluorescent alkynes 3 and 4..                | S12    |

## Mascot Reports from MS/MS Analysis

**Figure S1.** Mascot search report of labeled band from *E. coli* K12 lysate.

### Archive Report of Selected Matches

1. [77773](#) Mass: 8634 Score: 160 Queries matched: 2  
ACP

| Query             | Observed | Mr(expt)  | Mr(calc)  | ppm  | Miss | Score | Expect   | Rank | Peptide                               |
|-------------------|----------|-----------|-----------|------|------|-------|----------|------|---------------------------------------|
| <a href="#">2</a> | 542.8550 | 1083.6955 | 1083.6652 | 28.0 | 0    | 74    | 1.5e-007 | 1    | K.KIIGQLGVK.Q                         |
| <a href="#">6</a> | 858.4673 | 1714.9200 | 1714.8526 | 39.3 | 0    | 108   | 6.5e-010 | 1    | K.ITTVQAIDYINGHQA.- + Deamidated (NQ) |

Proteins matching the same set of peptides:

[144221](#) Mass: 8634 Score: 160 Queries matched: 2  
|asw Jun07 ACP|

---

### Search Parameters

Type of search : MS/MS Ion Search  
Enzyme : None  
Variable modifications : Deamidated (NQ),Gln->pyro-Glu (N-term Q),Oxidation (M)  
Mass values : Monoisotopic  
Protein Mass : Unrestricted  
Peptide Mass Tolerance :  $\pm 80$  ppm  
Fragment Mass Tolerance:  $\pm 0.1$  Da  
Max Missed Cleavages : 0  
Instrument type : ESI-QUAD-TOF  
Number of queries : 8

**Figure S2** Mascot search results for labeled band from *B. subtilis* 6051 lysate

Archive Report of Selected Matches

1. [654654](#) Mass: 8586 Score: 279 Queries matched: 5  
|ACP B.Subtilis amerocer|

| Query              | Observed | Mr(expt)  | Mr(calc)  | ppm    | Miss | Score | Expect   | Rank | Peptide                  |
|--------------------|----------|-----------|-----------|--------|------|-------|----------|------|--------------------------|
| <a href="#">1</a>  | 582.2691 | 1162.5236 | 1162.6016 | -67.11 | 1    | 51    | 7.6e-006 | 1    | -.MADTLERVTK.I           |
| <a href="#">13</a> | 771.3783 | 1540.7421 | 1540.8461 | -67.46 | 1    | 67    | 2.1e-007 | 1    | K.IIVDRLGVDEADVK.L       |
| <a href="#">16</a> | 540.9142 | 1619.7209 | 1619.8406 | -73.92 | 1    | 74    | 3.7e-008 | 1    | R.LGVDEADVKLEASFK.E      |
| <a href="#">17</a> | 817.3596 | 1632.7046 | 1632.8107 | -65.03 | 0    | 89    | 1.2e-009 | 1    | K.IATVGDAVNYIQNQQ.-      |
| <a href="#">29</a> | 739.6938 | 2216.0596 | 2216.2052 | -65.71 | 2    | 49    | 1.2e-005 | 1    | K.IIVDRLGVDEADVKLEASFK.E |

Search Parameters

Type of search : MS/MS Ion Search  
 Enzyme : Trypsin  
 Variable modifications : Deamidated (NQ),Gln->pyro-Glu (N-term Q),Oxidation (M)  
 Mass values : Monoisotopic  
 Protein Mass : Unrestricted  
 Peptide Mass Tolerance : ± 100 ppm  
 Fragment Mass Tolerance: ± 0.1 Da  
 Max Missed Cleavages : 2  
 Instrument type : ESI-QUAD-TOF  
 Number of queries : 36

**Figure S3** Mascot search results for labeled band from *B. subtilis* 168 lysate

3. [gi|16078655|ref|NP\\_389474.1|](#) Mass: 8586 Score: 131 Queries matched: 3 emPAI: 2.80  
acyl carrier protein [Bacillus subtilis subsp. subtilis str. 168]

| Query               | Observed | Mr(expt)  | Mr(calc)  | ppm  | Miss | Score | Expect   | Rank | Peptide             |
|---------------------|----------|-----------|-----------|------|------|-------|----------|------|---------------------|
| <a href="#">29</a>  | 582.3188 | 1162.6230 | 1162.6016 | 18.4 | 1    | 34    | 0.005    | 1    | -.MADTLERVTK.I      |
| <a href="#">112</a> | 771.4505 | 1540.8865 | 1540.8461 | 26.2 | 1    | 53    | 6e-005   | 1    | K.IIVDRLGVDEADVK.L  |
| <a href="#">127</a> | 817.4283 | 1632.8420 | 1632.8107 | 19.1 | 0    | 90    | 1.7e-008 | 1    | K.IATVGDAVNYIQNQQ.- |

## Figure S3 Mascot search results for labeled band from *S. oneidensis* MR-1

### Archive Report of Selected Matches

1. [gi|24374313|ref|NP\\_718356.1|](#) Mass: 8565 Score: 111 Queries matched: 1  
acyl carrier protein [Shewanella oneidensis MR-1]

| Query             | Observed | Mr(expt)  | Mr(calc)  | ppm  | Miss | Score | Expect | Rank | Peptide           |
|-------------------|----------|-----------|-----------|------|------|-------|--------|------|-------------------|
| <a href="#">1</a> | 704.9294 | 1407.8442 | 1407.7609 | 59.1 | 0    | 111   | 6e-008 | 1    | K.IITVQAAIDYVSK.N |

Proteins matching the same set of peptides:

[gi|91793644|ref|YP\\_563295.1|](#) Mass: 8569 Score: 111 Queries matched: 1  
acyl carrier protein [Shewanella denitrificans OS217]

[gi|119775114|ref|YP\\_927854.1|](#) Mass: 8581 Score: 111 Queries matched: 1  
acyl carrier protein [Shewanella amazonensis SB2B]

[gi|124549534|ref|ZP\\_01707712.1|](#) Mass: 7284 Score: 111 Queries matched: 1  
acyl carrier protein [Shewanella putrefaciens 200]

[gi|127512533|ref|YP\\_001093730.1|](#) Mass: 8579 Score: 111 Queries matched: 1  
acyl carrier protein [Shewanella loihica EV-4]

[gi|149117702|ref|ZP\\_01844374.1|](#) Mass: 3756 Score: 111 Queries matched: 1  
acyl carrier protein [Shewanella baltica OS223]

---

### Search Parameters

Type of search : MS/MS Ion Search  
Enzyme : Trypsin  
Variable modifications : Deamidated (NQ),Gln->pyro-Glu (N-term Q),Oxidation (M)  
Mass values : Monoisotopic  
Protein Mass : Unrestricted  
Peptide Mass Tolerance : ± 100 ppm  
Fragment Mass Tolerance : ± 0.12 Da  
Max Missed Cleavages : 1  
Instrument type : ESI-QUAD-TOF  
Number of queries : 1

## Figure S4 Mascot search result for labeled band in *B. brevis* 26A1 lysate.

### Archive Report of Selected Matches

2. [gi|30021938|ref|NP\\_833569|](#) Mass: 8809 Score: 83 Queries matched: 1  
acyl carrier protein

| Query              | Observed | Mr(expt)  | Mr(calc)  | ppm  | Miss | Score | Expect   | Rank | Peptide             |
|--------------------|----------|-----------|-----------|------|------|-------|----------|------|---------------------|
| <a href="#">18</a> | 788.4492 | 1574.8838 | 1574.8192 | 41.0 | 0    | 83    | 2.1e-007 | 1    | R.LGVETEYVPAASF.K.E |

Proteins matching the same set of peptides:

[gi|30263853|ref|NP\\_846230|](#) Mass: 8507 Score: 83 Queries matched: 1  
acyl carrier protein

[gi|42782942|ref|NP\\_980189|](#) Mass: 8507 Score: 83 Queries matched: 1  
acyl carrier protein

[gi|47529279|ref|YP\\_020628|](#) Mass: 8507 Score: 83 Queries matched: 1  
acyl carrier protein

[gi|49186700|ref|YP\\_029952|](#) Mass: 8507 Score: 83 Queries matched: 1  
acyl carrier protein

[gi|49479144|ref|YP\\_037911|](#) Mass: 8507 Score: 83 Queries matched: 1  
acyl carrier protein

[gi|52141635|ref|YP\\_085191|](#) Mass: 8507 Score: 83 Queries matched: 1  
acyl carrier protein

[gi|118479072|ref|YP\\_896223|](#) Mass: 8809 Score: 83 Queries matched: 1  
acyl carrier protein

---

### Search Parameters

Type of search : MS/MS Ion Search  
Enzyme : None  
Variable modifications : Deamidated (NQ),Gln->pyro-Glu (N-term Q),p-pantetheine (S)  
Mass values : Monoisotopic  
Protein Mass : Unrestricted  
Peptide Mass Tolerance : ± 100 ppm  
Fragment Mass Tolerance : ± 0.1 Da  
Max Missed Cleavages : 0  
Instrument type : ESI-QUAD-TOF  
Number of queries : 26

**Figure S5** Mascot search results for labeled band in SKBR3 lysate.

**Archive Report of Selected Matches**

1. [gi|67476453|sp|P49327|FAS\\_HUMAN](#) Mass: 273227 Score: 3083 Queries matched: 74 emPAI: 2.05  
 Fatty acid synthase [Includes: [Acyl-carrier-protein] S-acetyltransferase ; [Acyl-carrier-protein] S-malonyltransferase ; 3-oxo-

| Query               | Observed | Mr (expt) | Mr (calc) | ppm  | Miss | Score | Expect   | Rank | Peptide                                                  |
|---------------------|----------|-----------|-----------|------|------|-------|----------|------|----------------------------------------------------------|
| <a href="#">1</a>   | 506.8353 | 1011.6561 | 1011.6328 | 23.0 | 0    | 75    | 7.6e-006 | 1    | R.VAAAVDLIIK.S                                           |
| <a href="#">4</a>   | 519.7886 | 1037.5626 | 1037.5393 | 22.4 | 0    | 56    | 0.002    | 1    | R.VFTTVGSAEK.R                                           |
| <a href="#">5</a>   | 519.8468 | 1037.6791 | 1037.6485 | 29.5 | 0    | 49    | 0.0015   | 1    | R.GTPLISPLIK.W                                           |
| <a href="#">7</a>   | 521.8283 | 1041.6421 | 1041.6182 | 22.9 | 0    | 54    | 0.0022   | 1    | R.ELNLVLSVR.E                                            |
| <a href="#">8</a>   | 522.3081 | 1042.6016 | 1042.5771 | 23.5 | 0    | 60    | 0.00083  | 1    | K.AQVADVVS.R.W                                           |
| <a href="#">11</a>  | 535.2791 | 1068.5436 | 1068.5200 | 22.1 | 0    | 74    | 3.2e-005 | 1    | R.DPSQQELPR.L                                            |
| <a href="#">13</a>  | 537.2875 | 1072.5605 | 1072.5302 | 28.3 | 0    | 53    | 0.0062   | 1    | R.QVQPEGPYR.V                                            |
| <a href="#">15</a>  | 543.3201 | 1084.6256 | 1084.6128 | 11.8 | 0    | 66    | 0.00019  | 1    | R.QEPLIGSTK.S                                            |
| <a href="#">17</a>  | 558.3566 | 1114.6987 | 1114.6598 | 34.9 | 0    | 63    | 0.00024  | 1    | R.SEGVVAVLLTK.K                                          |
| <a href="#">23</a>  | 590.3109 | 1178.6073 | 1178.5502 | 48.4 | 0    | 45    | 0.032    | 1    | K.QAHTMDPQLR.L + Gln->pyro-Glu (N-term Q)                |
| <a href="#">26</a>  | 595.8389 | 1189.6632 | 1189.6343 | 24.3 | 0    | 57    | 0.0021   | 1    | R.SDEAVKPFGLK.V                                          |
| <a href="#">28</a>  | 598.2979 | 1194.5812 | 1194.5452 | 30.1 | 0    | (41)  | 0.081    | 1    | K.QAHTMDPQLR.L + Gln->pyro-Glu (N-term Q); Oxidation (M) |
| <a href="#">29</a>  | 598.8069 | 1195.5993 | 1195.5768 | 18.8 | 0    | (42)  | 0.06     | 1    | K.QAHTMDPQLR.L                                           |
| <a href="#">45</a>  | 621.3683 | 1240.7220 | 1240.6928 | 23.6 | 0    | 79    | 7.8e-006 | 1    | R.EVWLVQAGIR.D                                           |
| <a href="#">47</a>  | 623.3479 | 1244.6813 | 1244.6434 | 30.4 | 0    | 44    | 0.043    | 1    | R.AALQEELQLCK.G                                          |
| <a href="#">48</a>  | 624.3424 | 1246.6703 | 1246.6418 | 22.9 | 0    | 57    | 0.0024   | 1    | K.VSVHVIEGDHR.T                                          |
| <a href="#">53</a>  | 632.3867 | 1262.7589 | 1262.7347 | 19.2 | 0    | 72    | 2.8e-005 | 1    | R.LQVVDQPLPVR.G                                          |
| <a href="#">61</a>  | 645.8050 | 1289.5954 | 1289.5677 | 21.5 | 0    | 71    | 8.7e-005 | 1    | K.VYQWDDPDR.L                                            |
| <a href="#">62</a>  | 646.8413 | 1291.6681 | 1291.6152 | 41.0 | 0    | 109   | 1.4e-008 | 1    | -_MEEVVIAGMSGK.L + Acetyl (Protein N-term)               |
| <a href="#">63</a>  | 649.8613 | 1297.7080 | 1297.6626 | 35.0 | 0    | 107   | 1.7e-008 | 1    | K.VGDPQELNGITR.A                                         |
| <a href="#">64</a>  | 650.3605 | 1298.7064 | 1298.6466 | 46.0 | 0    | (87)  | 1.8e-006 | 1    | K.VGDPQELNGITR.A + Deamidated (NQ)                       |
| <a href="#">69</a>  | 661.8680 | 1321.7214 | 1321.6878 | 25.4 | 0    | 55    | 0.0032   | 1    | R.QQEQQVPILEK.F + Gln->pyro-Glu (N-term Q)               |
| <a href="#">71</a>  | 662.8294 | 1323.6443 | 1323.6050 | 29.7 | 0    | (82)  | 6.9e-006 | 1    | -_MEEVVIAGMSGK.L + Acetyl (Protein N-term); 2 Oxidation  |
| <a href="#">72</a>  | 665.8840 | 1329.7535 | 1329.7153 | 28.7 | 0    | 69    | 0.00011  | 1    | R.VTAIHIDPATHR.Q                                         |
| <a href="#">76</a>  | 670.3823 | 1338.7501 | 1338.7143 | 26.7 | 0    | (51)  | 0.0055   | 1    | R.QQEQQVPILEK.F                                          |
| <a href="#">81</a>  | 676.8826 | 1351.7506 | 1351.7282 | 16.5 | 0    | 68    | 0.00012  | 1    | K.MVVPGLDGAQIPR.D                                        |
| <a href="#">86</a>  | 693.9030 | 1385.7915 | 1385.7402 | 37.0 | 0    | 105   | 2.5e-008 | 1    | K.GVDLVLSLAEK.L                                          |
| <a href="#">88</a>  | 701.8559 | 1401.6973 | 1401.6446 | 37.6 | 0    | 81    | 9.7e-006 | 1    | K.ADEASELACPTPK.E + Propionamide (C)                     |
| <a href="#">89</a>  | 703.4254 | 1404.8362 | 1404.8089 | 19.4 | 0    | 98    | 8.5e-008 | 1    | R.DLVEVAHILGIR.D                                         |
| <a href="#">90</a>  | 703.8970 | 1405.7795 | 1405.7388 | 29.0 | 0    | 101   | 7.4e-008 | 1    | K.VLQGDVLMNVYR.D                                         |
| <a href="#">95</a>  | 711.9018 | 1421.7890 | 1421.7337 | 38.9 | 0    | (82)  | 5.9e-006 | 1    | K.VLQGDVLMNVYR.D + Oxidation (M)                         |
| <a href="#">97</a>  | 713.8993 | 1425.7841 | 1425.7650 | 13.4 | 0    | 77    | 1.7e-005 | 1    | R.SLLVNPEGPTLMR.L                                        |
| <a href="#">102</a> | 721.9174 | 1441.8202 | 1441.7599 | 41.8 | 0    | (57)  | 0.0018   | 1    | R.SLLVNPEGPTLMR.L + Oxidation (M)                        |
| <a href="#">105</a> | 735.3692 | 1468.7239 | 1468.6947 | 19.9 | 0    | 70    | 0.00012  | 1    | R.FPQLDSTSFANSR.D                                        |
| <a href="#">108</a> | 748.4380 | 1494.8615 | 1494.8154 | 30.8 | 1    | 52    | 0.0046   | 1    | R.RQEQQVPILEK.F                                          |
| <a href="#">113</a> | 768.9401 | 1535.8656 | 1535.8209 | 29.1 | 0    | 83    | 4.5e-006 | 1    | K.VVEVLVAGHGLYSR.I                                       |
| <a href="#">119</a> | 775.9112 | 1549.8078 | 1549.7624 | 29.3 | 0    | 90    | 1.3e-006 | 1    | R.AFEVSENGNLVVSQK.V + Deamidated (NQ)                    |
| <a href="#">124</a> | 797.4619 | 1592.9092 | 1592.8967 | 7.85 | 0    | 53    | 0.0042   | 1    | R.VLFPATGYLSIVWK.T                                       |
| <a href="#">127</a> | 807.4366 | 1612.8586 | 1612.8169 | 25.9 | 0    | 101   | 1e-007   | 1    | K.EDGLAQQTQLNLR.S                                        |
| <a href="#">128</a> | 811.9984 | 1621.9822 | 1621.9291 | 32.8 | 0    | 115   | 1e-009   | 1    | K.VVVQVLAEEPEAVLK.G                                      |
| <a href="#">132</a> | 825.9376 | 1649.8606 | 1649.8195 | 24.9 | 0    | (55)  | 0.0042   | 1    | K.SNMGHPEPASGLAALAK.V                                    |
| <a href="#">135</a> | 833.9291 | 1665.8437 | 1665.8144 | 17.6 | 0    | 72    | 8.3e-005 | 1    | K.SNMGHPEPASGLAALAK.V + Oxidation (M)                    |

**Figure S6** Fluorescent SDS-PAGE analysis of pan KO's

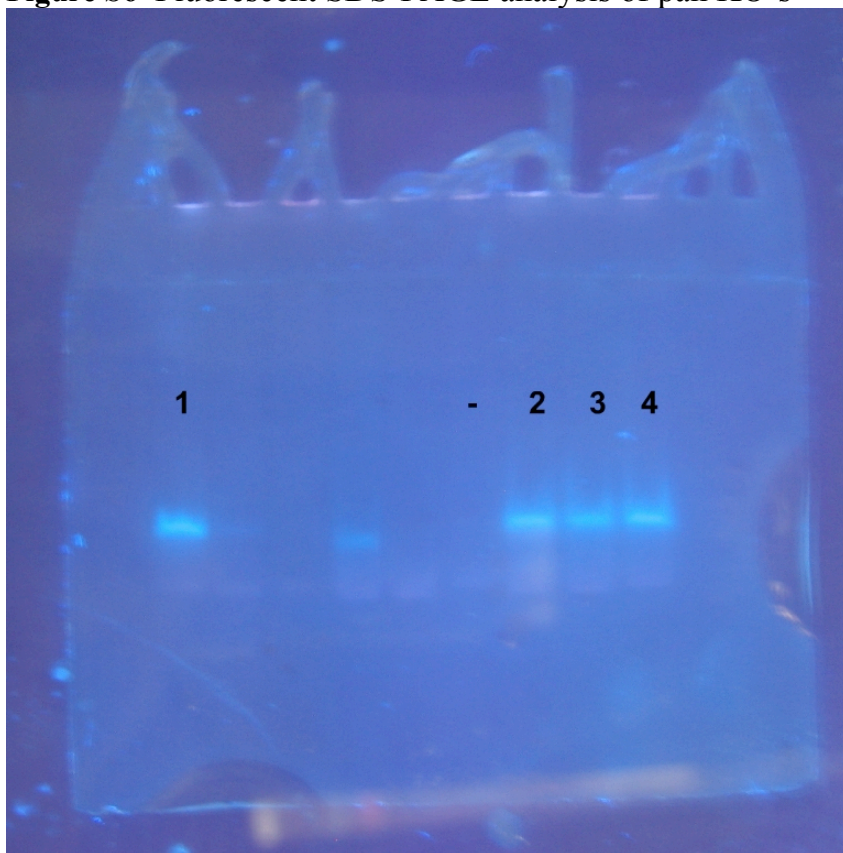

*E.coli* lacking the genes panF (2), panC (3), and panD (4), were incubated overnight with compound **1**. After lysis, the lysate was subjected to the conjugation reaction with fluorescent alkyne **3**. In each of the knockout strains, fatty acid ACP was labeled similarly as ACP in the native organism (1).

## Complete gel images

**Figure S7** In vivo ACP labeling in bacteria.

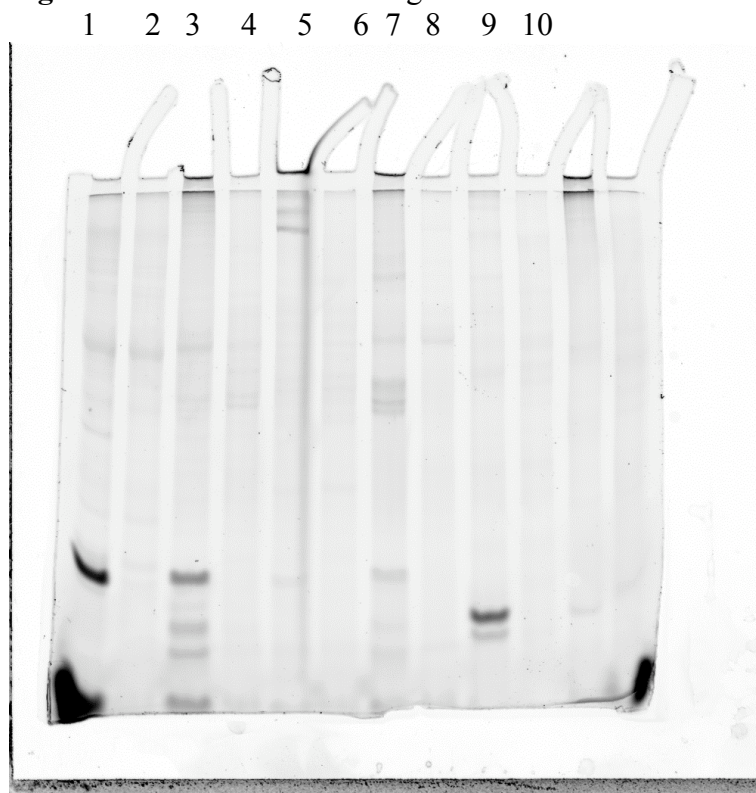

*E. coli* lysate from treated and untreated cultures (lanes 1&2). *B. subtilis* 6051 lysate from treated and untreated cultures (3&4). *B. brevis* 26A1 lysate from treated and untreated cultures (5&6). *B. subtilis* 168 lysate from treated and untreated cultures (7&8). *S. oneidensis* MR-1 lysate from treated and untreated cultures (9&10).

**Figure S8** SKBR3 lysate.

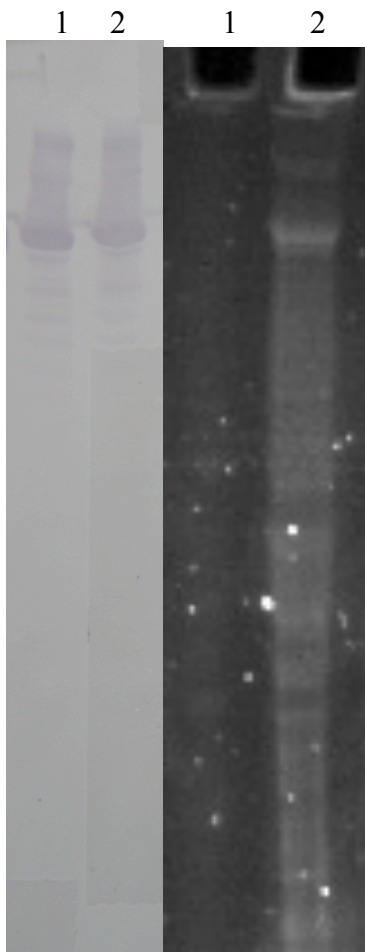

Human FAS detected by western blotting with Anti-FAS (Left). Lysate from treated (2) and untreated cultures (1)



## HPLC traces for all compound 2 CoA pathway intermediates

Figure S9 HPLC trace for compound 2

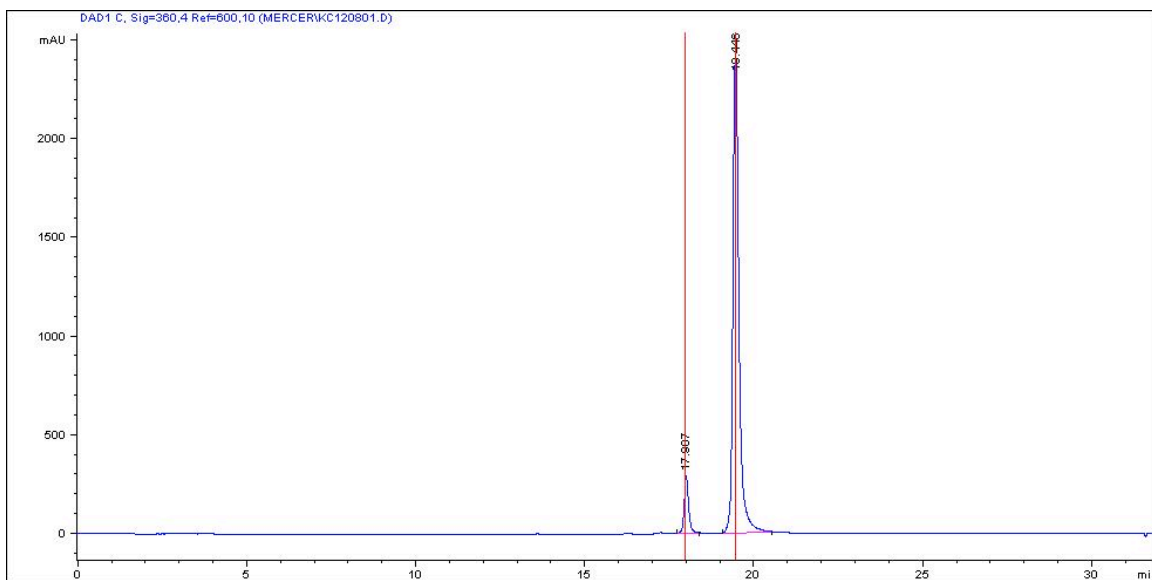

Figure S10 HPLC trace for compound 2 + PanK

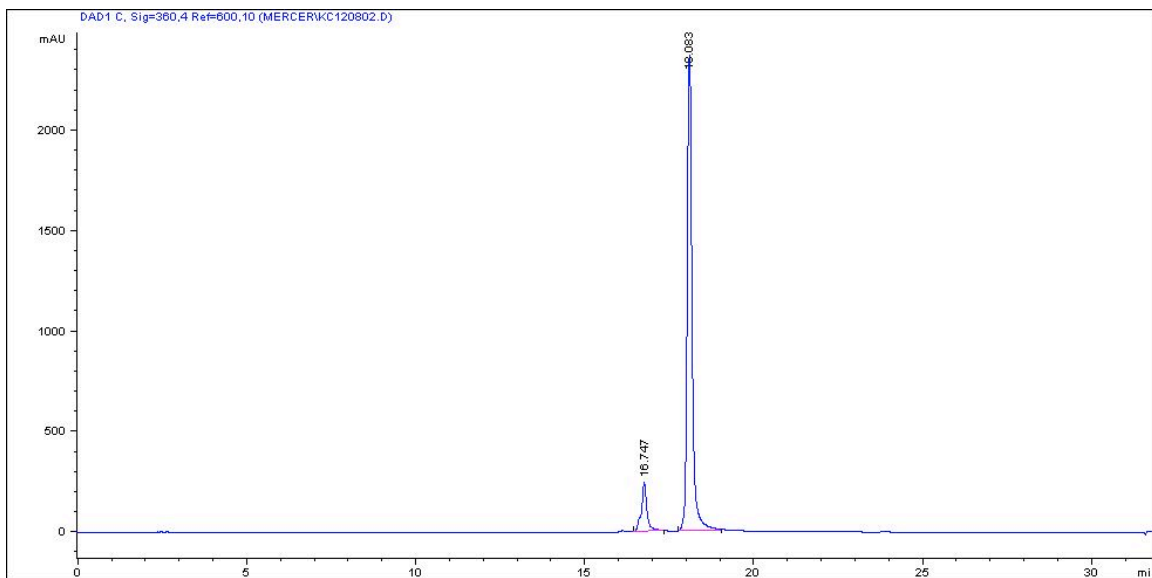

**Figure S11** HPLC trace for compound **2** + PanK + PPAT

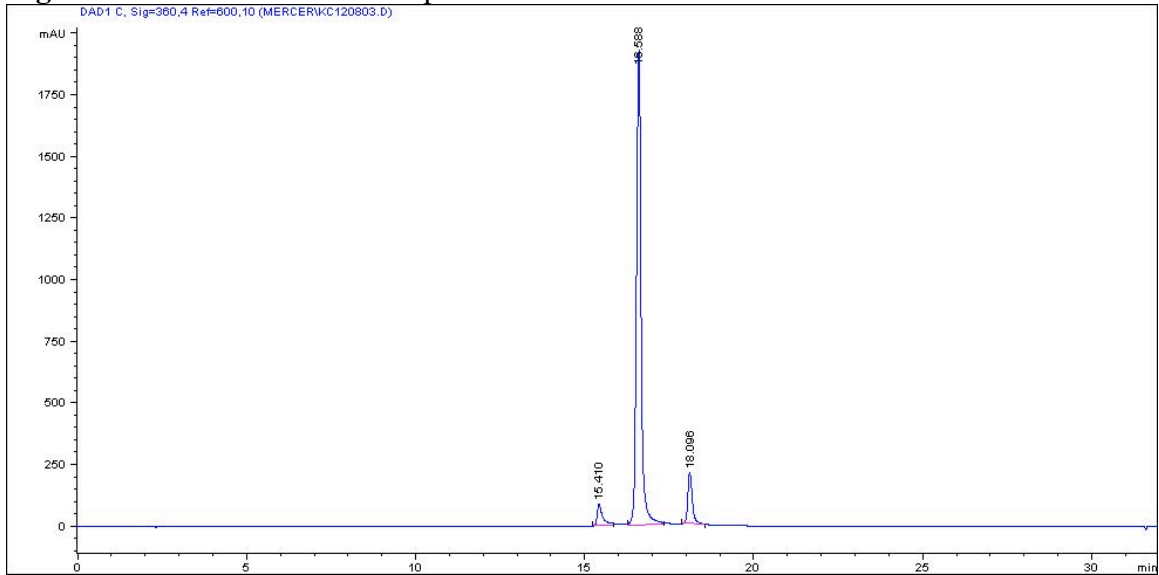

**Figure S12** HPLC trace for compound **2** + PanK + PPAT + DPCK

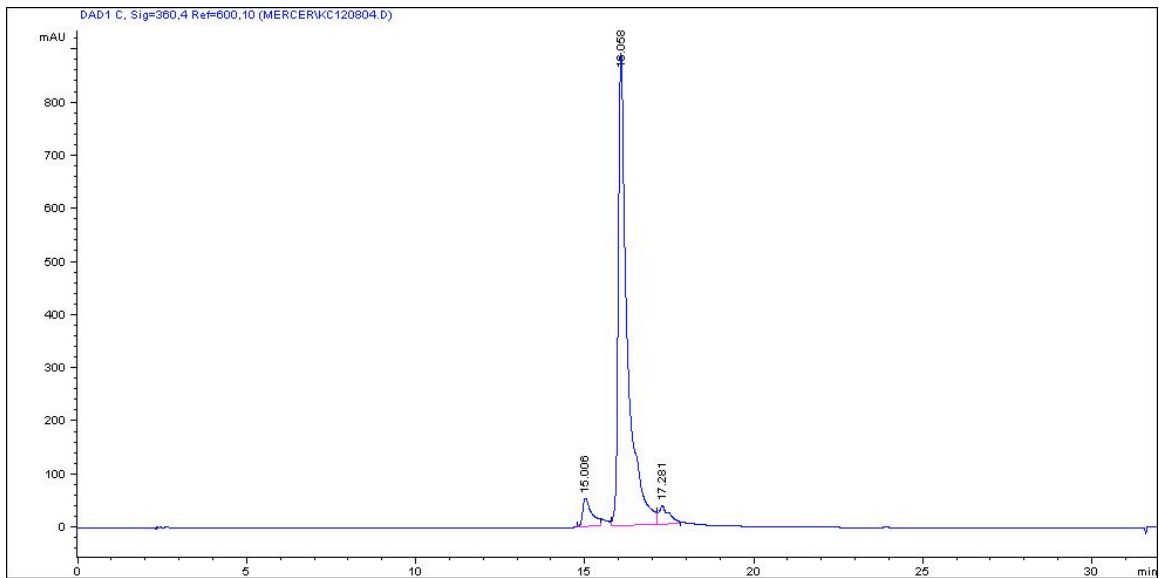

**Figure S13** HPLC trace of SKBR3 lysate.

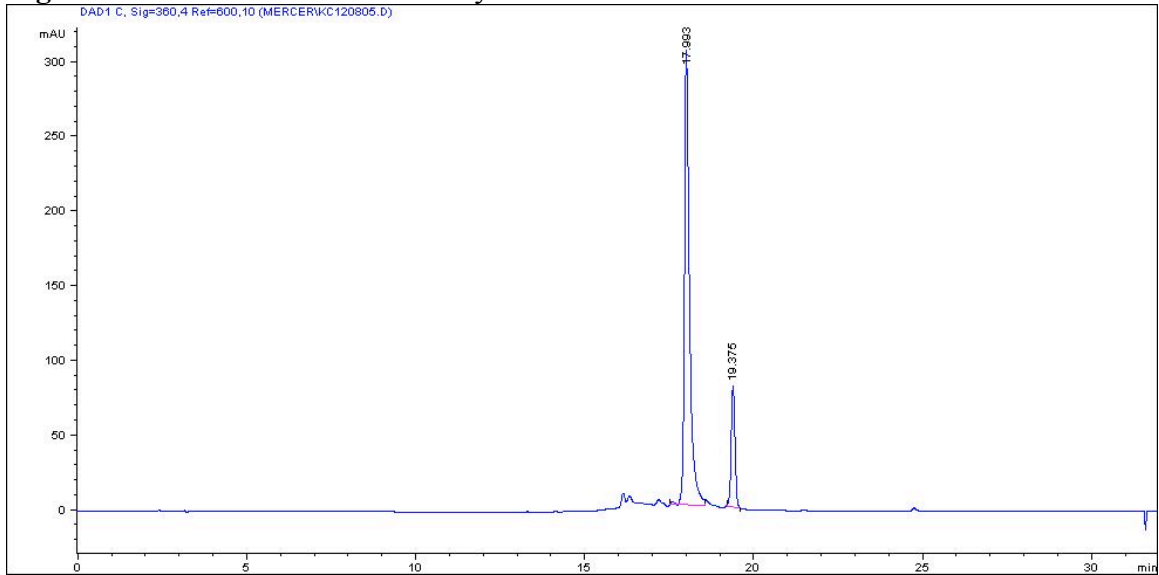

**Figure S14** HPLC trace showing co-elution of phospho-2 and SKBR3 lysate

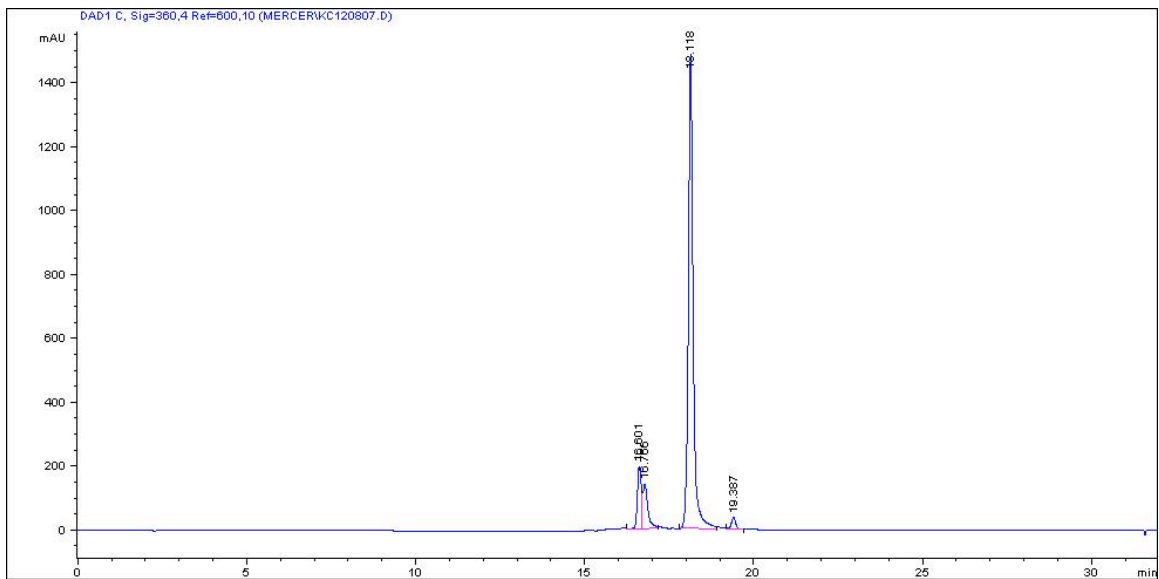

## Kinetics for pantetheine analogs

**Table S1** Kinetic values of pantetheine analogues with *E. coli* PanK

| Compound #       | Km         | Vmax      | Kcat      | Kcat/Km   |
|------------------|------------|-----------|-----------|-----------|
| 1                | 36.04±6.05 | 0.31±0.02 | 0.77±0.04 | 21.38±2.1 |
| 2                | 28.40±6.92 | 0.12±0.01 | 0.32±0.01 | 11.25±1.4 |
| N5-Pan           | 33.98±7.11 | 0.34±0.02 | 0.84±0.05 | 24.59±2.9 |
| Pantothenic acid | 28.56±1.76 | 0.21±0.00 | 0.52±0.02 | 18.25±1.9 |

**Figure S15** Structure of N5-Pan

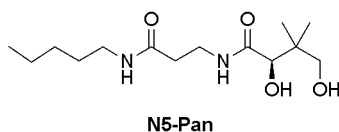

## Scheme for synthesis of fluorescent alkynes 3 and 4

Synthesis detailed in main text.

**a**

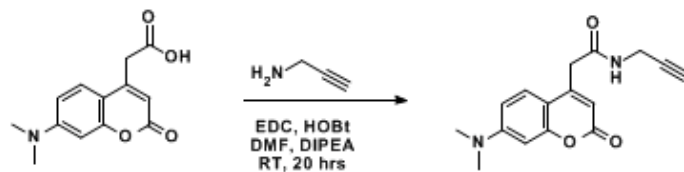

**b**

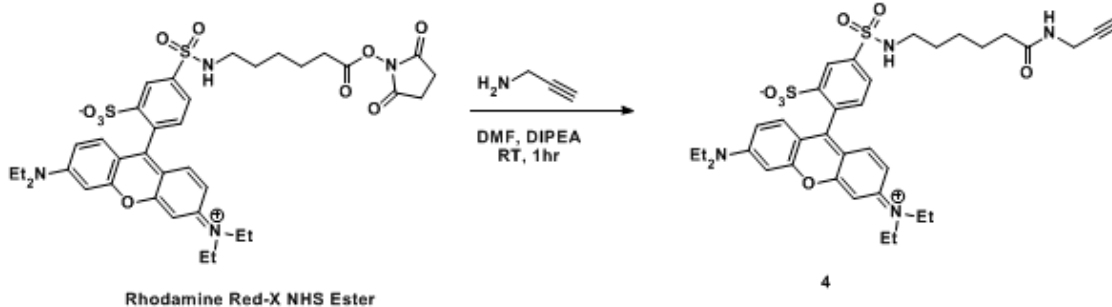

Supplement: NIHMS145994-supplement-SI.pdf [file NIHMS145994-supplement-SI.pdf]
